# Supplementary material for: Leaf Gas Exchange Performance of Ten Quinoa Genotypes under a Simulated Heat Wave
Source: MDPI journal article supplement (doi:10.3390/plants9010081), 2020-01-09
Supplement: s1 [file s1]

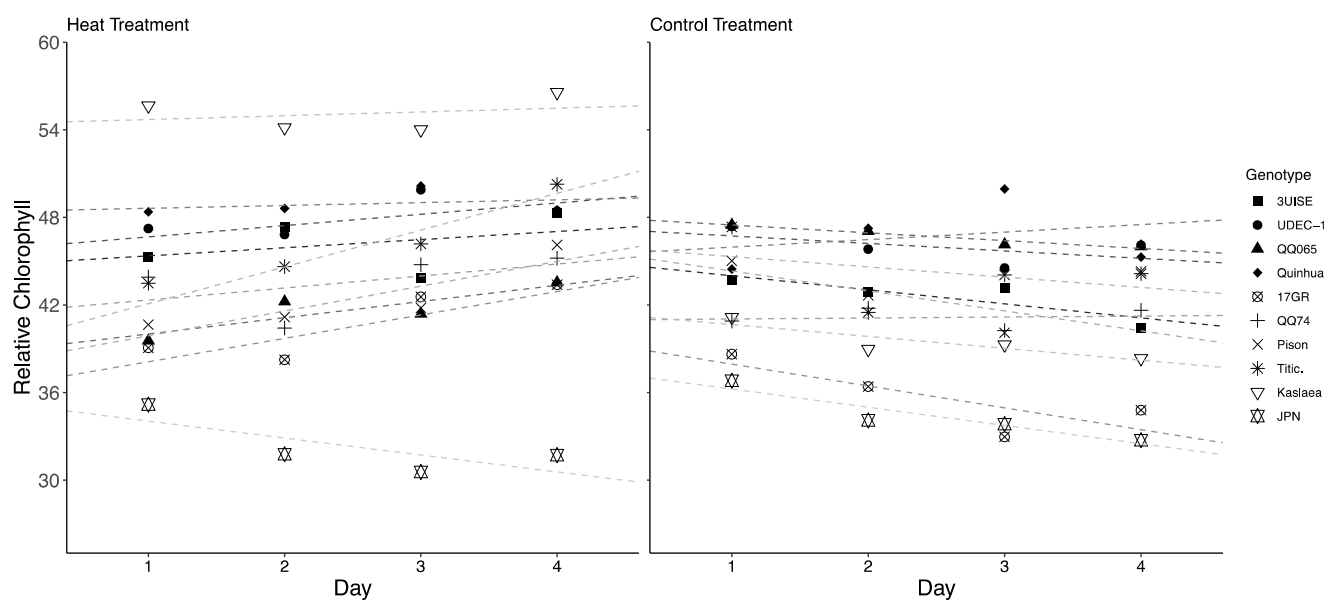

**Figure S1.** Relative chlorophyll by day of 10 quinoa genotypes exposed to a four-day heat treatment (A) (45 °C/30 °C) and control treatment (B) (20°C/14°C); day and night, respectively. Each point represents a mean relative chlorophyll content for each genotype ( $n = 5-9$ ). The fitted lines indicate the slope calculated from the linear regression model where average relative chlorophyll is a response to daytime.
